# Supplementary material
Source: PubMed Central journal article supplement (PMC3690879)
Supplement: 1303904110_pnas.201303904SI.pdf [file 1303904110_pnas.201303904SI.pdf]

# Supporting Information

Pasek et al. 10.1073/pnas.1303904110

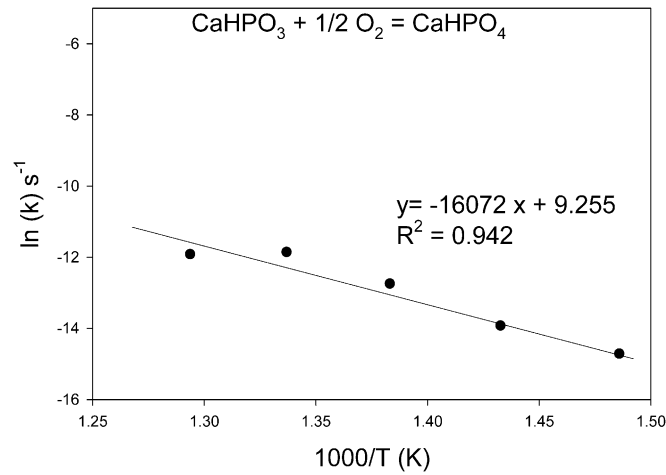

Fig. S1. Activation energy of oxidation reaction of CaHPO<sub>3</sub> is established from the slope of the data in an Arrhenius plot.

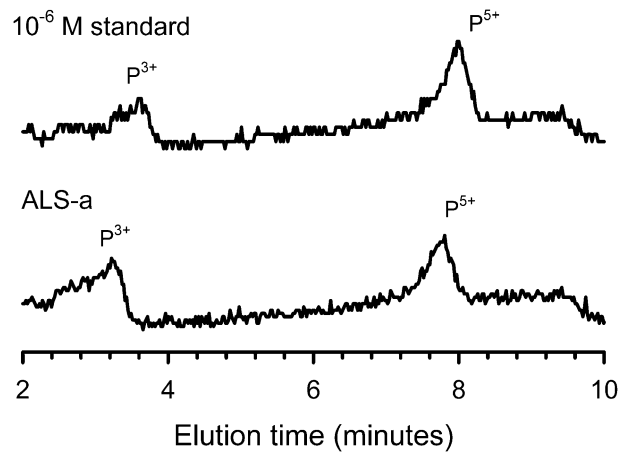

Fig. S2. Chromatogram showing separation of P species within a standard (10<sup>-6</sup> M solution) of each of hypophosphite (elution time ~1.1 min not shown), phosphite, and phosphate, compared with extract of Coonterunah carbonate rock (sample ALS-A) with peaks assigned to phosphite and phosphate.

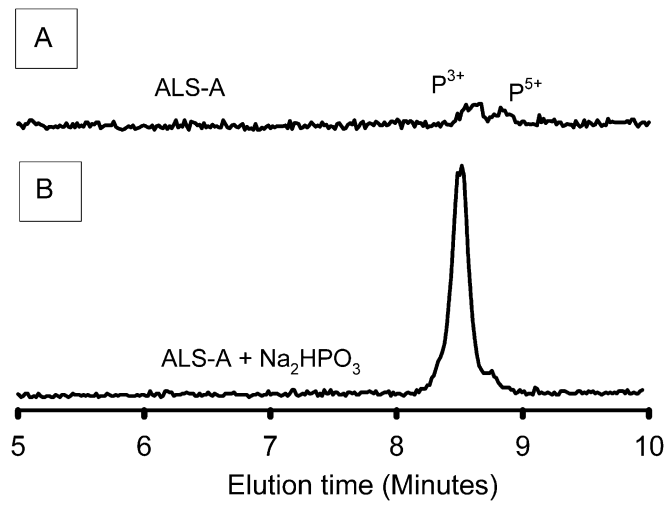

**Fig. S3.** Chromatogram showing extract of carbonate rock with peaks assigned to phosphite and phosphate (A) and with addition of a  $10^{-5}$  M sodium phosphite enhancing the phosphate peak (B).
